# Supplementary material for: A Gini approach to spatial CO2 emissions
Source: PLOS journal article supplement (doi:10.1371/journal.pone.0242479), 2020-11-18
Supplement: S1 (10.1371/journal.pone.0242479.s001) [file journal.pone.0242479.s001]

# S1 File

## Additional Figures

In S1(a) Fig the  $G_e$ -values are plotted vs. the corresponding GDP per capita values, as in Fig 4 in the main text, but here for states in the USA (analogous to Fig 6 in the main text). In contrast to the country analysis, we do not find correlations ( $\rho = 0.07$ , p-value: 0.64, not statistically significant). However, the  $G_e$ -values are consistently in the negative range so that overall high population densities come along with lower  $\text{CO}_2$  per capita (consistent with Fig 4 in the main text).

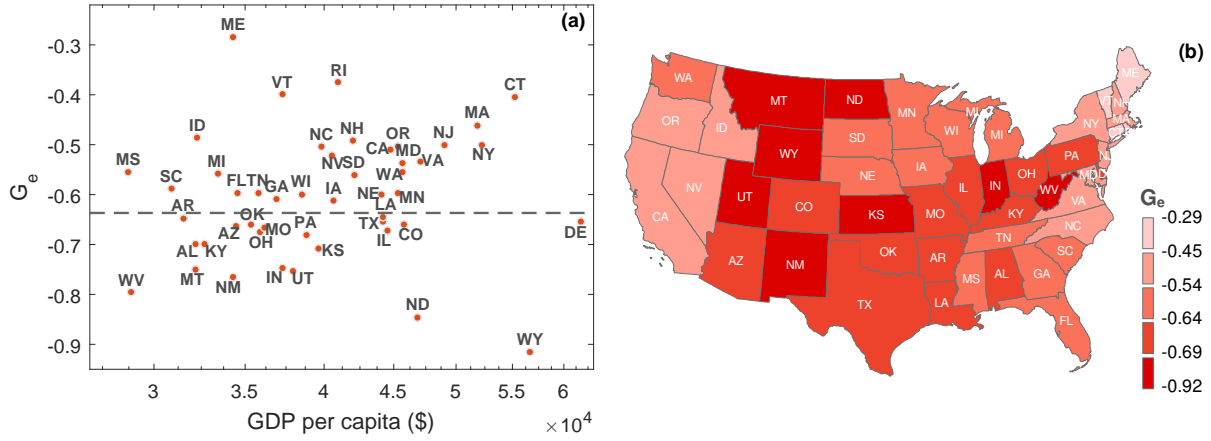

**S1 Fig: Sub-national inhomogeneity index  $G_e$  for the USA.** (a) The  $G_e$ -values are plotted against the corresponding state GDP per capita values on a logarithmic scale (excluding District of Columbia), analogous to Fig 4 in the main text. The dashed line indicates the country-level mean  $G_e$ . (b) Map of contiguous USA where the states are color-coded according to the inhomogeneity index  $G_e$ . The development dependence found in Fig 4 does not hold on the sub-national scale – at least for the USA. However, spatially the values are not random: large  $G_e$ -values occur at the east and west coasts while smaller ones occur in the predominantly sparsely populated states.

Results of the analogous analysis for the USA and the Vulcan data are displayed in S2(a) Fig. As can be seen, still there are no correlations between the obtained  $G_e$ -values and the GDP per capita. Comparing the resulting  $G_e$ -values from the Vulcan data with those obtained for the ODIAC data, we do find weak correlations [S2(b) Fig]. In comparison to the ODIAC, the Vulcan data

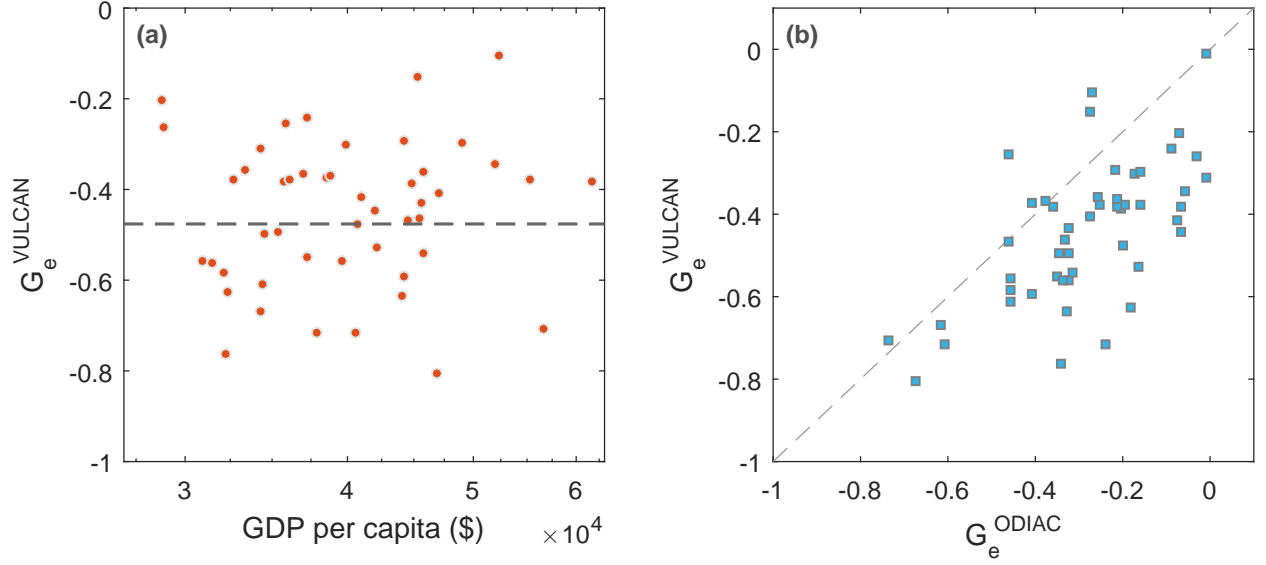

**S2 Fig: Sub-national inhomogeneity index  $G_e$  based on the Vulcan data.** We calculated the  $G_e$  on the state level for the USA based on the Vulcan data for the year 2002 at 10 km resolution<sup>1,2</sup>. In (a) the  $G_e$ -values are plotted against the corresponding state GDP per capita values on a logarithmic scale (excluding District of Columbia), analogous to Fig 1(a). The dashed line indicates the country-level mean  $G_e$ . It can be seen that also for the Vulcan data the development dependence does not hold on the sub-national scale in the USA. In (b) we show the correlations between the  $G_e$  obtained from the ODIAC data and the corresponding values obtained from the Vulcan data.

13 overall tends to exhibit lower  $G_e$ -values, indicating that there are more emissions from sites of low  
 14 population.

#### 15 S1 Appendix: Derivation of the relationship between $\beta$ and $G_e$

Denoting probability distribution functions with  $F$ , the theoretical quasi-Lorenz curve for emissions  $E \sim F_E$  with respect to population  $P \sim F_P$  is defined as

$$L_{E \circ P}(\theta) = \frac{1}{\mu_E} \int_{-\infty}^{S_P^{-1}(\theta)} \mu_{E|P}(t) dF_P(t) \quad 0 \leq \theta \leq 1 \quad (\text{S1})$$

where  $\mu_P$  and  $\mu_E$  are the respective means of  $P$  and  $E$  and  $\mu_{E|P}$  is the conditional mean of  $E$  given  $P$ . In contrast to the classical concentration curves<sup>3</sup>, the upper boundary of integration is given through the generalized inverse of  $S_P(p)$

$$S_P^{-1}(\theta) = \inf\{p : S_P(p) \geq \theta\}. \quad (\text{S2})$$

We call  $S_P(p)$  the share function defined as

$$S_P(p) = \frac{1}{\mu_P} \int_{-\infty}^p t dF_P(t). \quad (\text{S3})$$

If we assume that the population  $P$  is Pareto distributed with shape parameter  $\lambda > 1$  and scale  $p_{\min} > 0$ , the inverse share function  $S_P^{-1}(\theta)$  is given through

$$S_P^{-1}(\theta) = p_{\min}(1 - \theta)^{\frac{1}{1-\lambda}}. \quad (\text{S4})$$

If we further assume that the scaling relation  $E = aP^\beta$  holds, the conditional mean is simply given as  $\mu_{E|P}(t) = at^\beta$  and the unconditional mean for  $\beta < \lambda$  can be calculated as

$$\mu_E = \frac{\lambda}{\lambda - \beta} ap_{\min}^\beta. \quad (\text{S5})$$

If  $\beta \geq \lambda$  the unconditional mean becomes infinite and the quasi-Lorenz curve can not be computed.

Given the previous assumptions the quasi-Lorenz curve can be derived as

$$L_{E \circ P}(\theta) = \left[ \frac{\lambda}{\lambda - \beta} ap_{\min}^\beta \right]^{-1} \int_{p_{\min}}^{p_{\min}(1-\theta)^{\frac{1}{1-\lambda}}} a\lambda p_{\min}^\lambda t^{\beta-\lambda-1} dt \quad (\text{S6})$$

which simplifies to

$$L_{E \circ P}(\theta) = 1 - (1 - \theta)^{\frac{\lambda-\beta}{\lambda-1}}. \quad (\text{S7})$$

The generalized Gini coefficient  $G_e$  is then given by

$$G_e = 1 - 2 \int_0^1 L_{E \circ P}(\theta) d\theta = \frac{\beta - 1}{2\lambda - \beta - 1} \quad (\text{S8})$$

as stated in Eq (1) in the main text.

## References

- [1] Gurney, K. R. *et al.* High Resolution Fossil Fuel Combustion CO<sub>2</sub> Emission Fluxes for the United States. *Environmental Science & Technology* **43**, 5535–5541 (2009).
- [2] Gurney, K. R. *et al.* Quantification of fossil fuel CO<sub>2</sub> emissions on the building/street scale for a large U.S. city. *Environmental science & technology* **46**, 12194–202 (2012).
- [3] Yitzhaki, S. & Olkin, I. *Concentration indices and concentration curves*, vol. 19 of *Lecture Notes–Monograph Series*, 380–392 (Institute of Mathematical Statistics, 1991). URL <https://doi.org/10.1214/lnms/1215459867>.
